# Supplementary material
Source: PubMed Central journal article supplement (PMC2992301)

Supplemental Figure S1: Quantitative real time PCR (Fat body, Starved)

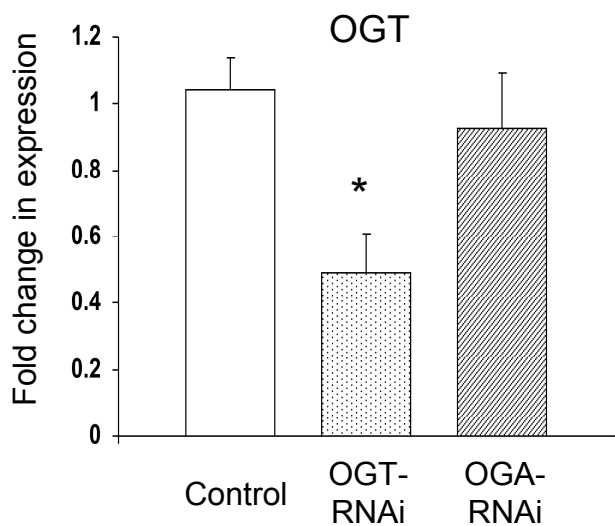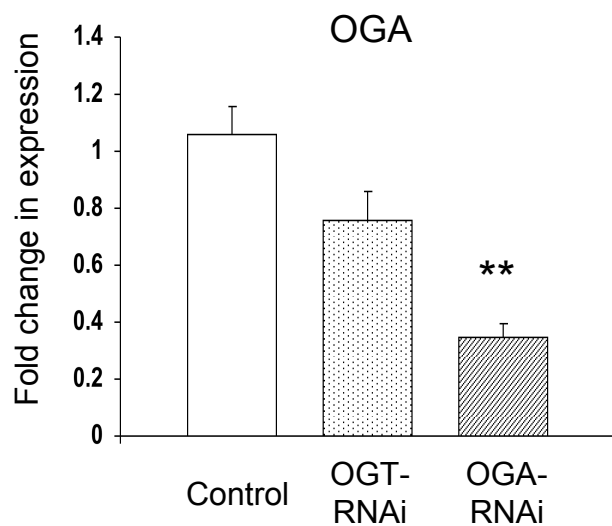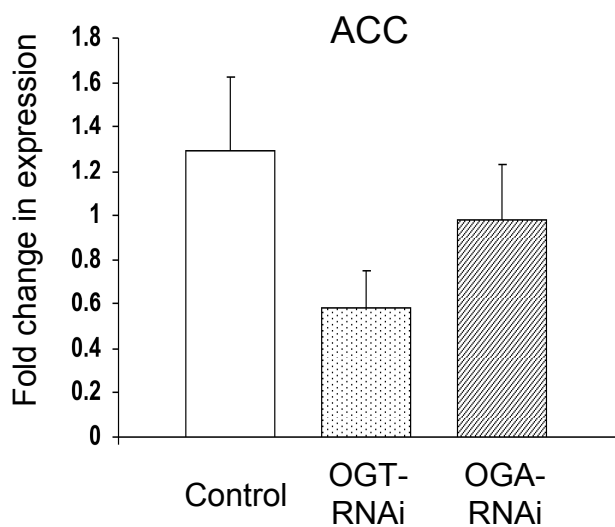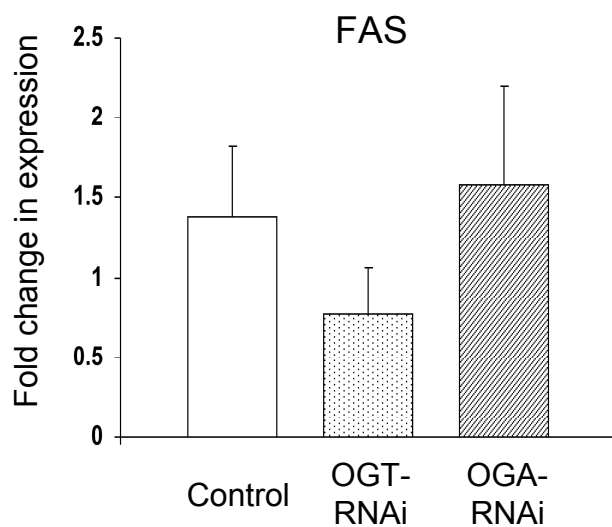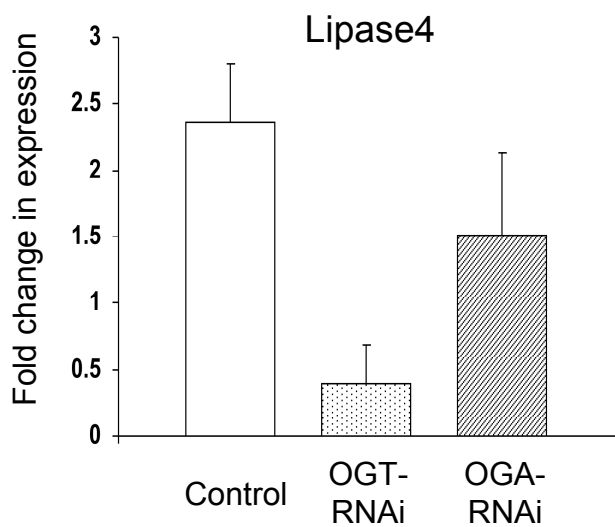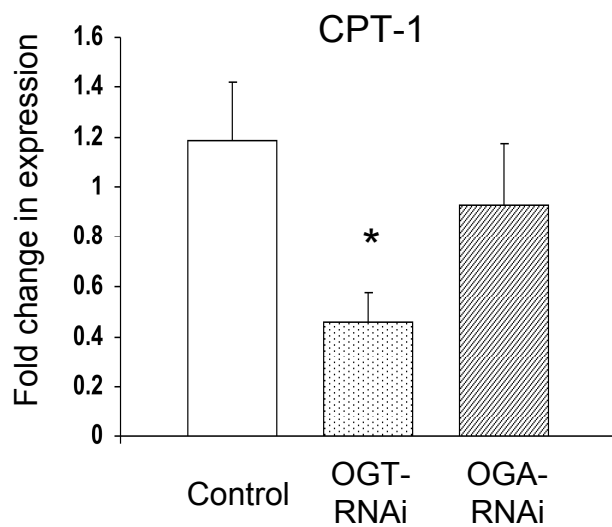

Supplemental Figure S2: Quantitative real time PCR (Fat body, Fed)

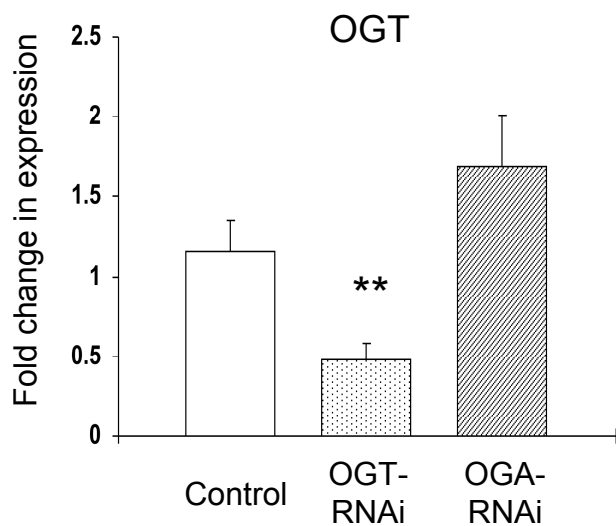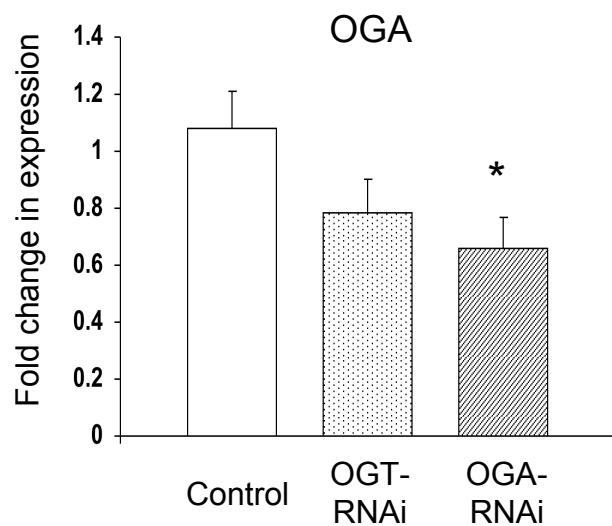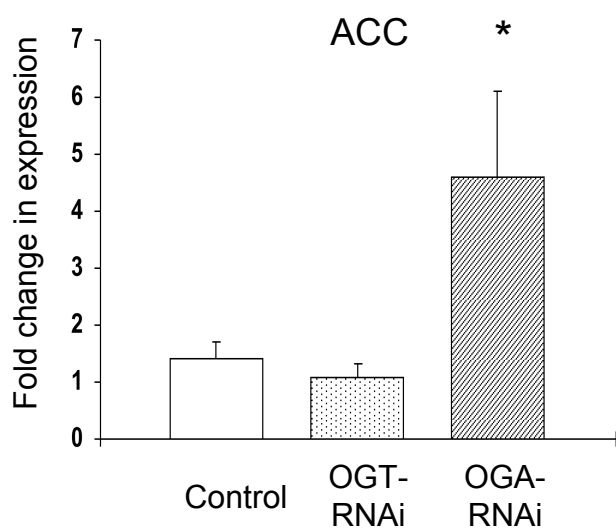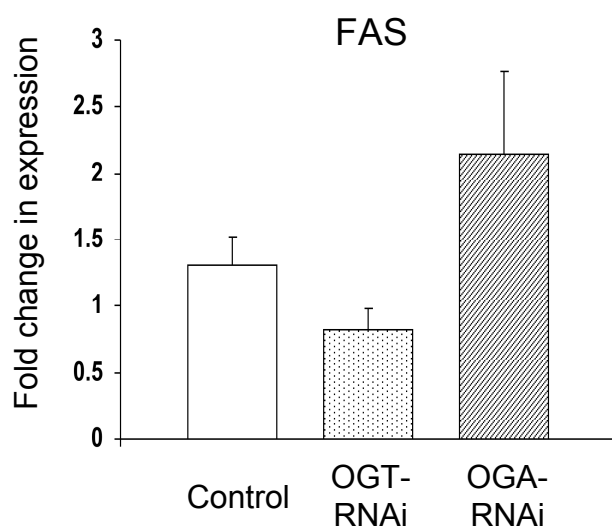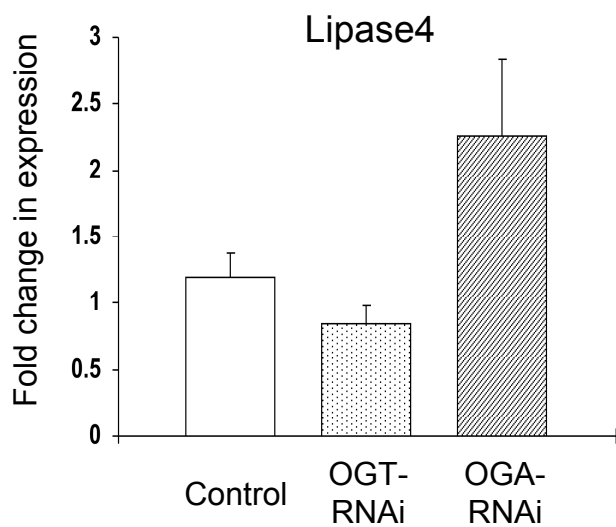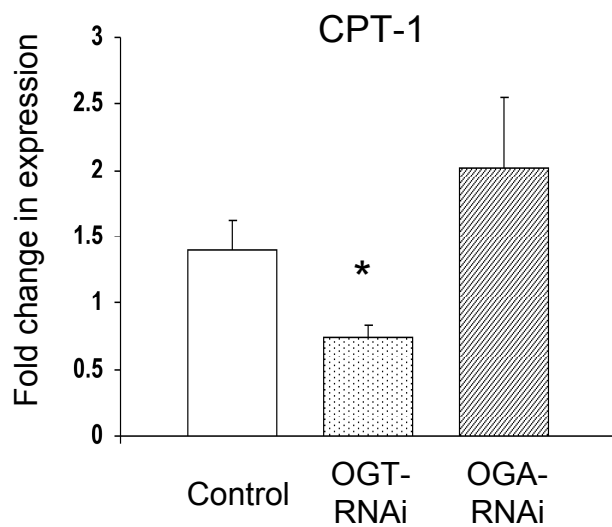

Supplement: supp_M110.155192_jbc.M110.155192-1.pdf [file supp_M110.155192_jbc.M110.155192-1.pdf]
